# Supplementary material for: Maternal omega-3 fatty acids regulate offspring obesity through persistent modulation of gut microbiota
Source: Microbiome. 2018 May 24;6:95. doi: 10.1186/s40168-018-0476-6 (PMC5968592; doi:10.1186/s40168-018-0476-6)
Supplement: Supplementary file 2 — Supplementary Data. (XLSX 75.6 kb) [file 40168_2018_476_MOESM2_ESM.xlsx]

## Sheet: PLS-R models
Model	DV(s)	EV(s)	R²			Quality
						Q² cum	R²Y cum	R²X cum
M13	Weight/IP/LBP	n-6/n-3(mom)/OTUs(pre and post HFD	0.456834	0.32087	0.346347	0.681705	0.774684	0.839464
M7	Weight/IP/LBP	n-6/n-3(offS)/OTUs(pre and post HFD	0.459085	0.319596	0.341772	0.878708	0.773484	0.841319
M1	Weight	n-6/n-3(mom)/OTUs(pre and post HFD	0.686128			0.908756	0.906128	0.959323
M2	IP	n-6/n-3(mom)/OTUs(pre and post HFD	0.724993			0.854916	0.824993	0.930925
M3	LBP	n-6/n-3(mom)/OTUs(pre and post HFD	0.606729			0.857281	0.806729	0.85109
M4	Weight	n-6/n-3(offS)/OTUs(pre and post HFD	0.684945			0.899814	0.914945	0.961405
M5	IP	n-6/n-3(offS)/OTUs(pre and post HFD	0.725495			0.83348	0.825495	0.933014
M6	LBP	n-6/n-3(offS)/OTUs(pre and post HFD	0.610985			0.83722	0.880985	0.951999
M8	OTUs (pre-HFD)	n-6/n-3(offS)	See sheet M8			0.850405	0.796194	1
M9	Weight	n-6/n-3(mom&offS)/OTUs	0.685365			0.700389	0.985365	0.960751
M10	IP	n-6/n-3(mom&offS)/OTUs	0.725247			0.90567	0.879618	0.875955
M11	LBP	n-6/n-3(mom&offS)/OTUs	0.608122			0.839271	0.808122	0.952579
M12	Weight/IP/LBP	n-6/n-3(mom&offS)/OTUs	0.454046	0.318604	0.348193	0.876734	0.973614	0.941268
M14	Weight/IP	OTUs(pre and post HFD	0.583012	0.418251		0.813119	0.700631	0.92891
	Abbreviations
	DV(s), dependent variables
	EV(s), explanatory variables
	DF, degree of freedom
	HFD, high-fat diet
	mom, mother
	offS, offspring
	OTUs, operational taxonomic units
	IP, intestinal permeability
	LBP, LPS-binding protein

## Sheet: M1
Variable	VIP
Anaerotruncus(pre-HFD)	2.05224
Bacteroidetes(post-HFD)	1.99868
Desulfovibrionaceae(post-HFD)	1.8555
Unknown(post-HFD)	1.85051
Desulfovibrionales(post-HFD)	1.83875
Deltaproteobacteria(post-HFD)	1.82761
Proteobacteria(post-HFD)	1.80172
Unknown(pre-HFD)	1.67736
Unknown(pre-HFD)	1.67736
Unknown(pre-HFD)	1.67736
Unknown(pre-HFD)	1.67736
Unknown(post-HFD)	1.63014
Unknown(post-HFD)	1.63014
Unknown(post-HFD)	1.63014
Unknown(post-HFD)	1.63014
Unknown(post-HFD)	1.62631
Unknown(post-HFD)	1.62631
Unknown(post-HFD)	1.62631
Unknown(post-HFD)	1.62631
Shannon DI(pre-HFD)(pre-HFD)	1.57467
Butyricimonas(post-HFD)	1.55477
Deferribacteres(post-HFD)	1.51508
Deferribacteres(post-HFD)	1.51508
Deferribacterales(post-HFD)	1.51508
Deferribacteraceae(post-HFD)	1.51508
Mucispirillum(post-HFD)	1.51508
Odoribacter(post-HFD)	1.46383
Erysipelotrichia(post-HFD)	1.43081
Erysipelotrichales(post-HFD)	1.43081
Erysipelotrichaceae(post-HFD)	1.43081
Epsilonproteobacteria(post-HFD)	1.4095
Campylobacterales(post-HFD)	1.4095
Helicobacteraceae(post-HFD)	1.4095
Helicobacter(post-HFD)	1.4095
Parabacteroides(post-HFD)	1.38773
Butyricimonas(pre-HFD)	1.36873
Unknown(pre-HFD)	1.32643
Rikenellaceae(post-HFD)	1.28888
Bacteroidia(post-HFD)	1.28853
Bacteroidales(post-HFD)	1.28853
Barnesiella(pre-HFD)	1.2815
Alistipes(post-HFD)	1.27453
Parabacteroides(pre-HFD)	1.2533
Unknown(pre-HFD)	1.23993
Unknown(pre-HFD)	1.23993
Unknown(pre-HFD)	1.23993
Clostridium_XVIII(post-HFD)	1.20292
Lactobacillaceae(pre-HFD)	1.19072
Lactobacillus(pre-HFD)	1.19072
Lactobacillales(post-HFD)	1.18557
Bacilli(post-HFD)	1.18546
Lactobacillaceae(post-HFD)	1.18334
Lactobacillus(post-HFD)	1.18334
Peptostreptococcaceae(post-HFD)	1.17791
Clostridium_XI(post-HFD)	1.17791
Lactobacillales(pre-HFD)	1.16348
Bacilli(pre-HFD)	1.16306
Bacteroidetes(pre-HFD)	1.1178
Unknown(pre-HFD)	1.11689
Unknown(pre-HFD)	1.11689
Unknown(pre-HFD)	1.11689
Verrucomicrobia(pre-HFD)	1.06392
Verrucomicrobiae(pre-HFD)	1.06392
Verrucomicrobiales(pre-HFD)	1.06392
Verrucomicrobiaceae(pre-HFD)	1.06392
Akkermansia(pre-HFD)	1.06392
Unknown(pre-HFD)	1.0231
Unknown(pre-HFD)	1.0231
Unknown(pre-HFD)	1.0231
Unknown(pre-HFD)	1.0231
Unknown(post-HFD)	1.0098
FIR/BAC(post-HFD)	0.999063
Clostridium_XlVb(pre-HFD)	0.944074
Eubacteriaceae(pre-HFD)	0.900174
Eubacterium(pre-HFD)	0.900174
Candidatus_Saccharibacteria(post-HFD)	0.883733
Unknown(post-HFD)	0.883733
Unknown(post-HFD)	0.883733
Unknown(post-HFD)	0.883733
Unknown(post-HFD)	0.883733
Unknown(post-HFD)	0.870382
Unknown(post-HFD)	0.865838
Unknown(post-HFD)	0.865838
Lachnospiraceae(post-HFD)	0.853993
Deferribacteres(pre-HFD)	0.849637
Deferribacteres(pre-HFD)	0.849637
Deferribacterales(pre-HFD)	0.849637
Deferribacteraceae(pre-HFD)	0.849637
Mucispirillum(pre-HFD)	0.849637
Clostridium_IV(pre-HFD)	0.810364
Clostridium_XlVa(post-HFD)	0.808822
Maternal tissue n-6/n-3(post-HFD)	0.801583
Unknown(post-HFD)	0.801009
Unknown(post-HFD)	0.801009
Unknown(post-HFD)	0.801009
Desulfovibrio(post-HFD)	0.788075
Unknown(post-HFD)	0.787623
Alistipes(pre-HFD)	0.787342
Deltaproteobacteria(pre-HFD)	0.784716
Rikenellaceae(pre-HFD)	0.781929
Bacteroidia(pre-HFD)	0.775327
Bacteroidales(pre-HFD)	0.775327
Unknown(post-HFD)	0.762422
Peptococcaceae_1(post-HFD)	0.762145
Peptococcus(post-HFD)	0.762145
Clostridium_XlVb(post-HFD)	0.755491
Unknown(pre-HFD)	0.721219
Streptococcaceae(pre-HFD)	0.715651
Oscillibacter(pre-HFD)	0.707548
Desulfovibrionales(pre-HFD)	0.700286
Desulfovibrionaceae(pre-HFD)	0.696201
Clostridiales(pre-HFD)	0.67465
Proteobacteria(pre-HFD)	0.669313
Clostridium_XlVa(pre-HFD)	0.664344
Alphaproteobacteria(pre-HFD)	0.661699
Unknown(pre-HFD)	0.661699
Unknown(pre-HFD)	0.661699
Unknown(pre-HFD)	0.661699
Clostridia(pre-HFD)	0.657423
Porphyromonadaceae(post-HFD)	0.655369
Porphyromonadaceae(pre-HFD)	0.63479
FIR/BAC(pre-HFD)(pre-HFD)	0.632436
Epsilonproteobacteria(pre-HFD)	0.622497
Campylobacterales(pre-HFD)	0.622497
Helicobacteraceae(pre-HFD)	0.622497
Helicobacter(pre-HFD)	0.622497
Peptostreptococcaceae(pre-HFD)	0.604027
Clostridium_XI(pre-HFD)	0.604027
Unknown(post-HFD)	0.587907
Unknown(post-HFD)	0.587907
Unknown(pre-HFD)	0.57461
Unknown(pre-HFD)	0.571893
Lachnospiraceae(pre-HFD)	0.567498
Ruminococcaceae(pre-HFD)	0.555063
Lactococcus(post-HFD)	0.548027
Ruminococcaceae(post-HFD)	0.545488
Peptococcaceae_1(pre-HFD)	0.543083
Peptococcus(pre-HFD)	0.543083
Firmicutes(post-HFD)	0.539932
Allobaculum(pre-HFD)	0.516969
Odoribacter(pre-HFD)	0.50945
Firmicutes(pre-HFD)	0.501613
Bacteroidaceae(pre-HFD)	0.497674
Bacteroides(pre-HFD)	0.497674
Clostridium_XVIII(pre-HFD)	0.494255
Bacteroidaceae(post-HFD)	0.489948
Bacteroides(post-HFD)	0.489948
Barnesiella(post-HFD)	0.474377
Streptococcaceae(post-HFD)	0.463612
Lactococcus(pre-HFD)	0.462523
Unknown(pre-HFD)	0.454819
Anaerotruncus(post-HFD)	0.450604
Unknown(pre-HFD)	0.424964
Unknown(pre-HFD)	0.424964
Unknown(pre-HFD)	0.424964
Unknown(pre-HFD)	0.424964
Unknown(pre-HFD)	0.424964
Shannon DI(post-HFD)	0.416862
Erysipelotrichia(pre-HFD)	0.411888
Erysipelotrichales(pre-HFD)	0.411888
Erysipelotrichaceae(pre-HFD)	0.411888
Clostridiaceae_1(pre-HFD)	0.33635
Clostridium_sensu_stricto(pre-HFD)	0.33635
Verrucomicrobia(post-HFD)	0.332343
Verrucomicrobiae(post-HFD)	0.332343
Verrucomicrobiales(post-HFD)	0.332343
Verrucomicrobiaceae(post-HFD)	0.332343
Akkermansia(post-HFD)	0.332343
Clostridiales(post-HFD)	0.280915
Clostridia(post-HFD)	0.263934
Unknown(post-HFD)	0.246795
Unknown(post-HFD)	0.246795
Unknown(post-HFD)	0.246795
Unknown(post-HFD)	0.246795
Unknown(post-HFD)	0.246795
Flavonifractor(pre-HFD)	0.241894
Rikenella(pre-HFD)	0.232009
Unknown(pre-HFD)	0.199128
Unknown(pre-HFD)	0.199128
Clostridium_IV(post-HFD)	0.190021
Oscillibacter(post-HFD)	0.189784
Turicibacter(pre-HFD)	0.150024
Unknown(post-HFD)	0.0216363
Unknown(post-HFD)	0.0216363
Unknown(post-HFD)	0.0216363

## Sheet: M2
Variable	VIP
Porphyromonadaceae(post-HFD)	2.38503
Unknown(post-HFD)	2.32639
Unknown(post-HFD)	2.32639
Unknown(post-HFD)	2.32639
Unknown(post-HFD)	2.24418
Lactobacillaceae(post-HFD)	1.9218
Lactobacillus(post-HFD)	1.9218
Unknown(post-HFD)	1.87297
Unknown(post-HFD)	1.87297
Barnesiella(pre-HFD)	1.86799
Anaerotruncus(pre-HFD)	1.85962
Lactobacillales(post-HFD)	1.78118
Bacilli(post-HFD)	1.78101
Allobaculum(pre-HFD)	1.77541
Barnesiella(post-HFD)	1.73486
Bacteroidia(post-HFD)	1.66783
Bacteroidales(post-HFD)	1.66783
Oscillibacter(post-HFD)	1.59109
Bacteroidia(pre-HFD)	1.56943
Bacteroidales(pre-HFD)	1.56943
Clostridium_XlVb(pre-HFD)	1.5523
Epsilonproteobacteria(post-HFD)	1.43956
Campylobacterales(post-HFD)	1.43956
Helicobacteraceae(post-HFD)	1.43956
Helicobacter(post-HFD)	1.43956
Bacteroidetes(pre-HFD)	1.42638
Candidatus_Saccharibacteria(post-HFD)	1.42259
Unknown(post-HFD)	1.42259
Unknown(post-HFD)	1.42259
Unknown(post-HFD)	1.42259
Unknown(post-HFD)	1.42259
Anaerotruncus(post-HFD)	1.36727
Clostridium_IV(post-HFD)	1.34968
Rikenellaceae(pre-HFD)	1.3479
Alistipes(pre-HFD)	1.3285
Streptococcaceae(post-HFD)	1.31946
Clostridium_XVIII(post-HFD)	1.31234
Lactococcus(post-HFD)	1.30383
Rikenella(pre-HFD)	1.28618
Streptococcaceae(pre-HFD)	1.27256
Lactococcus(pre-HFD)	1.26928
Unknown(pre-HFD)	1.25631
Unknown(pre-HFD)	1.25631
Bacteroidaceae(pre-HFD)	1.24168
Bacteroides(pre-HFD)	1.24168
Eubacteriaceae(pre-HFD)	1.18426
Eubacterium(pre-HFD)	1.18426
Bacteroidetes(post-HFD)	1.17022
Porphyromonadaceae(pre-HFD)	1.14972
Unknown(post-HFD)	1.11492
Unknown(post-HFD)	1.11492
Unknown(post-HFD)	1.11492
Unknown(post-HFD)	1.11492
Unknown(post-HFD)	1.11262
Unknown(post-HFD)	1.11262
Unknown(post-HFD)	1.11262
Unknown(post-HFD)	1.11262
Unknown(post-HFD)	1.11262
Unknown(pre-HFD)	1.06534
Lachnospiraceae(pre-HFD)	1.00014
Unknown(pre-HFD)	0.995906
Unknown(pre-HFD)	0.995906
Unknown(pre-HFD)	0.995906
Verrucomicrobia(post-HFD)	0.990659
Verrucomicrobiae(post-HFD)	0.990659
Verrucomicrobiales(post-HFD)	0.990659
Verrucomicrobiaceae(post-HFD)	0.990659
Akkermansia(post-HFD)	0.990659
Shannon DI(pre-HFD)(pre-HFD)	0.97137
Verrucomicrobia(pre-HFD)	0.966299
Verrucomicrobiae(pre-HFD)	0.966299
Verrucomicrobiales(pre-HFD)	0.966299
Verrucomicrobiaceae(pre-HFD)	0.966299
Akkermansia(pre-HFD)	0.966299
Ruminococcaceae(pre-HFD)	0.964151
Unknown(post-HFD)	0.934796
Desulfovibrio(post-HFD)	0.927512
Shannon DI(post-HFD)	0.924518
Clostridium_IV(pre-HFD)	0.895524
Unknown(post-HFD)	0.893371
Unknown(post-HFD)	0.893371
Unknown(post-HFD)	0.893371
Clostridia(pre-HFD)	0.878079
Desulfovibrionales(post-HFD)	0.872027
Desulfovibrionaceae(post-HFD)	0.866423
Clostridiales(pre-HFD)	0.863898
Deltaproteobacteria(post-HFD)	0.849361
Unknown(post-HFD)	0.841303
Unknown(pre-HFD)	0.821442
Bacilli(pre-HFD)	0.779293
Lactobacillales(pre-HFD)	0.779187
Lachnospiraceae(post-HFD)	0.7683
Unknown(post-HFD)	0.766342
Lactobacillaceae(pre-HFD)	0.75725
Lactobacillus(pre-HFD)	0.75725
Clostridium_XlVa(post-HFD)	0.753081
Butyricimonas(pre-HFD)	0.75274
Odoribacter(pre-HFD)	0.73664
Firmicutes(pre-HFD)	0.734082
Maternal tissue n-6/n-3(post-HFD)	0.695532
FIR/BAC(pre-HFD)(pre-HFD)	0.688377
Unknown(pre-HFD)	0.65293
Unknown(pre-HFD)	0.65293
Unknown(pre-HFD)	0.65293
Erysipelotrichia(post-HFD)	0.641284
Erysipelotrichales(post-HFD)	0.641284
Erysipelotrichaceae(post-HFD)	0.641284
Flavonifractor(pre-HFD)	0.630801
Unknown(pre-HFD)	0.630446
Clostridium_XVIII(pre-HFD)	0.599372
Ruminococcaceae(post-HFD)	0.579492
Unknown(pre-HFD)	0.549643
Unknown(pre-HFD)	0.549643
Unknown(pre-HFD)	0.549643
Unknown(pre-HFD)	0.549643
Unknown(post-HFD)	0.544374
Desulfovibrionales(pre-HFD)	0.532915
Unknown(post-HFD)	0.532755
Unknown(post-HFD)	0.532755
Unknown(post-HFD)	0.532755
Unknown(post-HFD)	0.532755
Desulfovibrionaceae(pre-HFD)	0.520502
Oscillibacter(pre-HFD)	0.503821
Unknown(pre-HFD)	0.503718
Alphaproteobacteria(pre-HFD)	0.49549
Unknown(pre-HFD)	0.49549
Unknown(pre-HFD)	0.49549
Unknown(pre-HFD)	0.49549
Unknown(pre-HFD)	0.478254
Unknown(pre-HFD)	0.478254
Unknown(pre-HFD)	0.478254
Unknown(pre-HFD)	0.478254
Unknown(pre-HFD)	0.478254
Peptococcaceae_1(pre-HFD)	0.4697
Peptococcus(pre-HFD)	0.4697
Deltaproteobacteria(pre-HFD)	0.443012
Turicibacter(pre-HFD)	0.437117
Butyricimonas(post-HFD)	0.410378
Unknown(pre-HFD)	0.379464
Proteobacteria(pre-HFD)	0.364413
Proteobacteria(post-HFD)	0.363553
Unknown(post-HFD)	0.358816
Unknown(post-HFD)	0.358816
Bacteroidaceae(post-HFD)	0.342437
Bacteroides(post-HFD)	0.342437
Epsilonproteobacteria(pre-HFD)	0.339415
Campylobacterales(pre-HFD)	0.339415
Helicobacteraceae(pre-HFD)	0.339415
Helicobacter(pre-HFD)	0.339415
Odoribacter(post-HFD)	0.336916
Deferribacteres(pre-HFD)	0.312156
Deferribacteres(pre-HFD)	0.312156
Deferribacterales(pre-HFD)	0.312156
Deferribacteraceae(pre-HFD)	0.312156
Mucispirillum(pre-HFD)	0.312156
Erysipelotrichia(pre-HFD)	0.305653
Erysipelotrichales(pre-HFD)	0.305653
Erysipelotrichaceae(pre-HFD)	0.305653
Peptococcaceae_1(post-HFD)	0.288762
Peptococcus(post-HFD)	0.288762
Rikenellaceae(post-HFD)	0.274586
FIR/BAC(post-HFD)	0.260944
Parabacteroides(pre-HFD)	0.254901
Clostridia(post-HFD)	0.238207
Alistipes(post-HFD)	0.236163
Peptostreptococcaceae(pre-HFD)	0.224981
Clostridium_XI(pre-HFD)	0.224981
Parabacteroides(post-HFD)	0.19036
Clostridiales(post-HFD)	0.189388
Clostridium_XlVa(pre-HFD)	0.145869
Peptostreptococcaceae(post-HFD)	0.130243
Clostridium_XI(post-HFD)	0.130243
Deferribacteres(post-HFD)	0.121517
Deferribacteres(post-HFD)	0.121517
Deferribacterales(post-HFD)	0.121517
Deferribacteraceae(post-HFD)	0.121517
Mucispirillum(post-HFD)	0.121517
Firmicutes(post-HFD)	0.110836
Clostridiaceae_1(pre-HFD)	0.0888229
Clostridium_sensu_stricto(pre-HFD)	0.0888229
Clostridium_XlVb(post-HFD)	0.0866837
Unknown(pre-HFD)	0.0334778
Unknown(pre-HFD)	0.0334778
Unknown(pre-HFD)	0.0334778
Unknown(pre-HFD)	0.0334778

## Sheet: M4
Variable	VIP
Anaerotruncus(pre-HFD)	2.04742
Bacteroidetes(post-HFD)	1.99399
Desulfovibrionaceae(post-HFD)	1.85115
Unknown(post-HFD)	1.84617
Desulfovibrionales(post-HFD)	1.83443
Deltaproteobacteria(post-HFD)	1.82332
Proteobacteria(post-HFD)	1.79749
Unknown(pre-HFD)	1.67342
Unknown(pre-HFD)	1.67342
Unknown(pre-HFD)	1.67342
Unknown(pre-HFD)	1.67342
Unknown(post-HFD)	1.62632
Unknown(post-HFD)	1.62632
Unknown(post-HFD)	1.62632
Unknown(post-HFD)	1.62632
Unknown(post-HFD)	1.6225
Unknown(post-HFD)	1.6225
Unknown(post-HFD)	1.6225
Unknown(post-HFD)	1.6225
Shannon DI(pre-HFD)(pre-HFD)	1.57098
Butyricimonas(post-HFD)	1.55112
Deferribacteres(post-HFD)	1.51153
Deferribacteres(post-HFD)	1.51153
Deferribacterales(post-HFD)	1.51153
Deferribacteraceae(post-HFD)	1.51153
Mucispirillum(post-HFD)	1.51153
Odoribacter(post-HFD)	1.46039
Erysipelotrichia(post-HFD)	1.42746
Erysipelotrichales(post-HFD)	1.42746
Erysipelotrichaceae(post-HFD)	1.42746
Epsilonproteobacteria(post-HFD)	1.40619
Campylobacterales(post-HFD)	1.40619
Helicobacteraceae(post-HFD)	1.40619
Helicobacter(post-HFD)	1.40619
Parabacteroides(post-HFD)	1.38448
Butyricimonas(pre-HFD)	1.36552
Unknown(pre-HFD)	1.32332
Rikenellaceae(post-HFD)	1.28585
Bacteroidia(post-HFD)	1.28551
Bacteroidales(post-HFD)	1.28551
Barnesiella(pre-HFD)	1.27849
Alistipes(post-HFD)	1.27154
Parabacteroides(pre-HFD)	1.25036
Unknown(pre-HFD)	1.23702
Unknown(pre-HFD)	1.23702
Unknown(pre-HFD)	1.23702
Offspring tissue n-6/n-3(pre-HFD)	1.2274
Clostridium_XVIII(post-HFD)	1.2001
Lactobacillaceae(pre-HFD)	1.18792
Lactobacillus(pre-HFD)	1.18792
Lactobacillales(post-HFD)	1.18279
Bacilli(post-HFD)	1.18267
Lactobacillaceae(post-HFD)	1.18056
Lactobacillus(post-HFD)	1.18056
Peptostreptococcaceae(post-HFD)	1.17514
Clostridium_XI(post-HFD)	1.17514
Lactobacillales(pre-HFD)	1.16075
Bacilli(pre-HFD)	1.16033
Bacteroidetes(pre-HFD)	1.11517
Unknown(pre-HFD)	1.11427
Unknown(pre-HFD)	1.11427
Unknown(pre-HFD)	1.11427
Verrucomicrobia(pre-HFD)	1.06143
Verrucomicrobiae(pre-HFD)	1.06143
Verrucomicrobiales(pre-HFD)	1.06143
Verrucomicrobiaceae(pre-HFD)	1.06143
Akkermansia(pre-HFD)	1.06143
Unknown(pre-HFD)	1.0207
Unknown(pre-HFD)	1.0207
Unknown(pre-HFD)	1.0207
Unknown(pre-HFD)	1.0207
Unknown(post-HFD)	1.00743
FIR/BAC(post-HFD)	0.996719
Clostridium_XlVb(pre-HFD)	0.94186
Eubacteriaceae(pre-HFD)	0.898063
Eubacterium(pre-HFD)	0.898063
Candidatus_Saccharibacteria(post-HFD)	0.88166
Unknown(post-HFD)	0.88166
Unknown(post-HFD)	0.88166
Unknown(post-HFD)	0.88166
Unknown(post-HFD)	0.88166
Unknown(post-HFD)	0.86834
Unknown(post-HFD)	0.863807
Unknown(post-HFD)	0.863807
Lachnospiraceae(post-HFD)	0.851989
Deferribacteres(pre-HFD)	0.847644
Deferribacteres(pre-HFD)	0.847644
Deferribacterales(pre-HFD)	0.847644
Deferribacteraceae(pre-HFD)	0.847644
Mucispirillum(pre-HFD)	0.847644
Clostridium_IV(pre-HFD)	0.808463
Clostridium_XlVa(post-HFD)	0.806925
Unknown(post-HFD)	0.79913
Unknown(post-HFD)	0.79913
Unknown(post-HFD)	0.79913
Desulfovibrio(post-HFD)	0.786227
Unknown(post-HFD)	0.785775
Alistipes(pre-HFD)	0.785495
Deltaproteobacteria(pre-HFD)	0.782875
Rikenellaceae(pre-HFD)	0.780094
Bacteroidia(pre-HFD)	0.773508
Bacteroidales(pre-HFD)	0.773508
Unknown(post-HFD)	0.760634
Peptococcaceae_1(post-HFD)	0.760357
Peptococcus(post-HFD)	0.760357
Clostridium_XlVb(post-HFD)	0.753718
Unknown(pre-HFD)	0.719527
Streptococcaceae(pre-HFD)	0.713972
Oscillibacter(pre-HFD)	0.705888
Desulfovibrionales(pre-HFD)	0.698643
Desulfovibrionaceae(pre-HFD)	0.694567
Clostridiales(pre-HFD)	0.673068
Proteobacteria(pre-HFD)	0.667743
Clostridium_XlVa(pre-HFD)	0.662785
Alphaproteobacteria(pre-HFD)	0.660147
Unknown(pre-HFD)	0.660147
Unknown(pre-HFD)	0.660147
Unknown(pre-HFD)	0.660147
Clostridia(pre-HFD)	0.65588
Porphyromonadaceae(post-HFD)	0.653832
Porphyromonadaceae(pre-HFD)	0.633301
FIR/BAC(pre-HFD)(pre-HFD)	0.630952
Epsilonproteobacteria(pre-HFD)	0.621036
Campylobacterales(pre-HFD)	0.621036
Helicobacteraceae(pre-HFD)	0.621036
Helicobacter(pre-HFD)	0.621036
Peptostreptococcaceae(pre-HFD)	0.60261
Clostridium_XI(pre-HFD)	0.60261
Unknown(post-HFD)	0.586528
Unknown(post-HFD)	0.586528
Unknown(pre-HFD)	0.573262
Unknown(pre-HFD)	0.570552
Lachnospiraceae(pre-HFD)	0.566166
Ruminococcaceae(pre-HFD)	0.553761
Lactococcus(post-HFD)	0.546741
Ruminococcaceae(post-HFD)	0.544208
Peptococcaceae_1(pre-HFD)	0.541809
Peptococcus(pre-HFD)	0.541809
Firmicutes(post-HFD)	0.538666
Allobaculum(pre-HFD)	0.515756
Odoribacter(pre-HFD)	0.508255
Firmicutes(pre-HFD)	0.500436
Bacteroidaceae(pre-HFD)	0.496506
Bacteroides(pre-HFD)	0.496506
Clostridium_XVIII(pre-HFD)	0.493095
Bacteroidaceae(post-HFD)	0.488798
Bacteroides(post-HFD)	0.488798
Barnesiella(post-HFD)	0.473264
Streptococcaceae(post-HFD)	0.462524
Lactococcus(pre-HFD)	0.461438
Unknown(pre-HFD)	0.453752
Anaerotruncus(post-HFD)	0.449547
Unknown(pre-HFD)	0.423967
Unknown(pre-HFD)	0.423967
Unknown(pre-HFD)	0.423967
Unknown(pre-HFD)	0.423967
Unknown(pre-HFD)	0.423967
Shannon DI(post-HFD)	0.415884
Erysipelotrichia(pre-HFD)	0.410922
Erysipelotrichales(pre-HFD)	0.410922
Erysipelotrichaceae(pre-HFD)	0.410922
Clostridiaceae_1(pre-HFD)	0.335561
Clostridium_sensu_stricto(pre-HFD)	0.335561
Verrucomicrobia(post-HFD)	0.331563
Verrucomicrobiae(post-HFD)	0.331563
Verrucomicrobiales(post-HFD)	0.331563
Verrucomicrobiaceae(post-HFD)	0.331563
Akkermansia(post-HFD)	0.331563
Clostridiales(post-HFD)	0.280256
Clostridia(post-HFD)	0.263315
Unknown(post-HFD)	0.246216
Unknown(post-HFD)	0.246216
Unknown(post-HFD)	0.246216
Unknown(post-HFD)	0.246216
Unknown(post-HFD)	0.246216
Flavonifractor(pre-HFD)	0.241326
Rikenella(pre-HFD)	0.231465
Unknown(pre-HFD)	0.19866
Unknown(pre-HFD)	0.19866
Clostridium_IV(post-HFD)	0.189575
Oscillibacter(post-HFD)	0.189339
Turicibacter(pre-HFD)	0.149672
Unknown(post-HFD)	0.0215855
Unknown(post-HFD)	0.0215855
Unknown(post-HFD)	0.0215855

## Sheet: M5
Variable	VIP
Porphyromonadaceae(post-HFD)	2.38812
Unknown(post-HFD)	2.32941
Unknown(post-HFD)	2.32941
Unknown(post-HFD)	2.32941
Unknown(post-HFD)	2.2471
Lactobacillaceae(post-HFD)	1.92429
Lactobacillus(post-HFD)	1.92429
Unknown(post-HFD)	1.8754
Unknown(post-HFD)	1.8754
Barnesiella(pre-HFD)	1.87042
Anaerotruncus(pre-HFD)	1.86203
Lactobacillales(post-HFD)	1.78349
Bacilli(post-HFD)	1.78332
Allobaculum(pre-HFD)	1.77772
Barnesiella(post-HFD)	1.73711
Bacteroidia(post-HFD)	1.67
Bacteroidales(post-HFD)	1.67
Oscillibacter(post-HFD)	1.59315
Bacteroidia(pre-HFD)	1.57147
Bacteroidales(pre-HFD)	1.57147
Clostridium_XlVb(pre-HFD)	1.55431
Epsilonproteobacteria(post-HFD)	1.44143
Campylobacterales(post-HFD)	1.44143
Helicobacteraceae(post-HFD)	1.44143
Helicobacter(post-HFD)	1.44143
Bacteroidetes(pre-HFD)	1.42823
Candidatus_Saccharibacteria(post-HFD)	1.42444
Unknown(post-HFD)	1.42444
Unknown(post-HFD)	1.42444
Unknown(post-HFD)	1.42444
Unknown(post-HFD)	1.42444
Anaerotruncus(post-HFD)	1.36904
Clostridium_IV(post-HFD)	1.35143
Rikenellaceae(pre-HFD)	1.34965
Alistipes(pre-HFD)	1.33022
Streptococcaceae(post-HFD)	1.32118
Clostridium_XVIII(post-HFD)	1.31404
Lactococcus(post-HFD)	1.30553
Rikenella(pre-HFD)	1.28785
Streptococcaceae(pre-HFD)	1.27421
Lactococcus(pre-HFD)	1.27093
Unknown(pre-HFD)	1.25794
Unknown(pre-HFD)	1.25794
Bacteroidaceae(pre-HFD)	1.24329
Bacteroides(pre-HFD)	1.24329
Eubacteriaceae(pre-HFD)	1.1858
Eubacterium(pre-HFD)	1.1858
Bacteroidetes(post-HFD)	1.17174
Porphyromonadaceae(pre-HFD)	1.15122
Unknown(post-HFD)	1.11636
Unknown(post-HFD)	1.11636
Unknown(post-HFD)	1.11636
Unknown(post-HFD)	1.11636
Unknown(post-HFD)	1.11406
Unknown(post-HFD)	1.11406
Unknown(post-HFD)	1.11406
Unknown(post-HFD)	1.11406
Unknown(post-HFD)	1.11406
Unknown(pre-HFD)	1.06672
Lachnospiraceae(pre-HFD)	1.00144
Unknown(pre-HFD)	0.9972
Unknown(pre-HFD)	0.9972
Unknown(pre-HFD)	0.9972
Verrucomicrobia(post-HFD)	0.991946
Verrucomicrobiae(post-HFD)	0.991946
Verrucomicrobiales(post-HFD)	0.991946
Verrucomicrobiaceae(post-HFD)	0.991946
Akkermansia(post-HFD)	0.991946
Shannon DI(pre-HFD)(pre-HFD)	0.972632
Verrucomicrobia(pre-HFD)	0.967554
Verrucomicrobiae(pre-HFD)	0.967554
Verrucomicrobiales(pre-HFD)	0.967554
Verrucomicrobiaceae(pre-HFD)	0.967554
Akkermansia(pre-HFD)	0.967554
Ruminococcaceae(pre-HFD)	0.965403
Unknown(post-HFD)	0.93601
Desulfovibrio(post-HFD)	0.928717
Shannon DI(post-HFD)	0.925719
Clostridium_IV(pre-HFD)	0.896688
Unknown(post-HFD)	0.894531
Unknown(post-HFD)	0.894531
Unknown(post-HFD)	0.894531
Clostridia(pre-HFD)	0.879219
Desulfovibrionales(post-HFD)	0.873159
Desulfovibrionaceae(post-HFD)	0.867549
Clostridiales(pre-HFD)	0.86502
Deltaproteobacteria(post-HFD)	0.850464
Unknown(post-HFD)	0.842395
Unknown(pre-HFD)	0.822509
Bacilli(pre-HFD)	0.780306
Lactobacillales(pre-HFD)	0.780199
Lachnospiraceae(post-HFD)	0.769298
Unknown(post-HFD)	0.767338
Lactobacillaceae(pre-HFD)	0.758234
Lactobacillus(pre-HFD)	0.758234
Clostridium_XlVa(post-HFD)	0.75406
Butyricimonas(pre-HFD)	0.753718
Odoribacter(pre-HFD)	0.737597
Firmicutes(pre-HFD)	0.735036
FIR/BAC(pre-HFD)(pre-HFD)	0.689272
Unknown(pre-HFD)	0.653778
Unknown(pre-HFD)	0.653778
Unknown(pre-HFD)	0.653778
Erysipelotrichia(post-HFD)	0.642117
Erysipelotrichales(post-HFD)	0.642117
Erysipelotrichaceae(post-HFD)	0.642117
Flavonifractor(pre-HFD)	0.631621
Unknown(pre-HFD)	0.631265
Clostridium_XVIII(pre-HFD)	0.60015
Ruminococcaceae(post-HFD)	0.580244
Unknown(pre-HFD)	0.550357
Unknown(pre-HFD)	0.550357
Unknown(pre-HFD)	0.550357
Unknown(pre-HFD)	0.550357
Unknown(post-HFD)	0.545081
Desulfovibrionales(pre-HFD)	0.533607
Unknown(post-HFD)	0.533447
Unknown(post-HFD)	0.533447
Unknown(post-HFD)	0.533447
Unknown(post-HFD)	0.533447
Desulfovibrionaceae(pre-HFD)	0.521178
Oscillibacter(pre-HFD)	0.504475
Unknown(pre-HFD)	0.504372
Alphaproteobacteria(pre-HFD)	0.496134
Unknown(pre-HFD)	0.496134
Unknown(pre-HFD)	0.496134
Unknown(pre-HFD)	0.496134
Unknown(pre-HFD)	0.478875
Unknown(pre-HFD)	0.478875
Unknown(pre-HFD)	0.478875
Unknown(pre-HFD)	0.478875
Unknown(pre-HFD)	0.478875
Peptococcaceae_1(pre-HFD)	0.47031
Peptococcus(pre-HFD)	0.47031
Deltaproteobacteria(pre-HFD)	0.443588
Turicibacter(pre-HFD)	0.437685
Butyricimonas(post-HFD)	0.410911
Unknown(pre-HFD)	0.379957
Proteobacteria(pre-HFD)	0.364886
Proteobacteria(post-HFD)	0.364025
Unknown(post-HFD)	0.359282
Unknown(post-HFD)	0.359282
Bacteroidaceae(post-HFD)	0.342881
Bacteroides(post-HFD)	0.342881
Epsilonproteobacteria(pre-HFD)	0.339856
Campylobacterales(pre-HFD)	0.339856
Helicobacteraceae(pre-HFD)	0.339856
Helicobacter(pre-HFD)	0.339856
Odoribacter(post-HFD)	0.337353
Deferribacteres(pre-HFD)	0.312561
Deferribacteres(pre-HFD)	0.312561
Deferribacterales(pre-HFD)	0.312561
Deferribacteraceae(pre-HFD)	0.312561
Mucispirillum(pre-HFD)	0.312561
Erysipelotrichia(pre-HFD)	0.30605
Erysipelotrichales(pre-HFD)	0.30605
Erysipelotrichaceae(pre-HFD)	0.30605
Peptococcaceae_1(post-HFD)	0.289137
Peptococcus(post-HFD)	0.289137
Rikenellaceae(post-HFD)	0.274943
FIR/BAC(post-HFD)	0.261283
Parabacteroides(pre-HFD)	0.255233
Clostridia(post-HFD)	0.238516
Alistipes(post-HFD)	0.236469
Peptostreptococcaceae(pre-HFD)	0.225274
Clostridium_XI(pre-HFD)	0.225274
Parabacteroides(post-HFD)	0.190607
Clostridiales(post-HFD)	0.189634
Clostridium_XlVa(pre-HFD)	0.146058
Peptostreptococcaceae(post-HFD)	0.130412
Clostridium_XI(post-HFD)	0.130412
Deferribacteres(post-HFD)	0.121675
Deferribacteres(post-HFD)	0.121675
Deferribacterales(post-HFD)	0.121675
Deferribacteraceae(post-HFD)	0.121675
Mucispirillum(post-HFD)	0.121675
Firmicutes(post-HFD)	0.11098
Clostridiaceae_1(pre-HFD)	0.0889383
Clostridium_sensu_stricto(pre-HFD)	0.0889383
Clostridium_XlVb(post-HFD)	0.0867963
Offspring tissue n-6/n-3(pre-HFD)	0.0640271
Unknown(pre-HFD)	0.0335213
Unknown(pre-HFD)	0.0335213
Unknown(pre-HFD)	0.0335213
Unknown(pre-HFD)	0.0335213

## Sheet: M6
Variable	VIP
Verrucomicrobia(post-HFD)	2.41552
Verrucomicrobiae(post-HFD)	2.41552
Verrucomicrobiales(post-HFD)	2.41552
Verrucomicrobiaceae(post-HFD)	2.41552
Akkermansia(post-HFD)	2.41552
Peptostreptococcaceae(pre-HFD)	2.26606
Clostridium_XI(pre-HFD)	2.26606
Unknown(post-HFD)	2.01139
Unknown(post-HFD)	2.01139
Unknown(post-HFD)	2.01139
Unknown(post-HFD)	2.01139
Rikenella(pre-HFD)	1.89173
Unknown(pre-HFD)	1.79391
Unknown(pre-HFD)	1.79391
Unknown(pre-HFD)	1.79391
Offspring tissue n-6/n-3(pre-HFD)	1.79153
Erysipelotrichia(post-HFD)	1.72233
Erysipelotrichales(post-HFD)	1.72233
Erysipelotrichaceae(post-HFD)	1.72233
Clostridium_XVIII(post-HFD)	1.56595
Clostridium_XlVa(pre-HFD)	1.54581
Eubacteriaceae(pre-HFD)	1.4607
Eubacterium(pre-HFD)	1.4607
Streptococcaceae(pre-HFD)	1.44907
Unknown(post-HFD)	1.3815
Unknown(pre-HFD)	1.36073
Unknown(pre-HFD)	1.36073
Unknown(pre-HFD)	1.36073
Unknown(pre-HFD)	1.36073
Clostridium_XlVb(pre-HFD)	1.31847
Firmicutes(pre-HFD)	1.30026
Unknown(post-HFD)	1.29404
Unknown(post-HFD)	1.29404
Lactococcus(pre-HFD)	1.28858
Unknown(post-HFD)	1.27243
Clostridiales(pre-HFD)	1.23987
Clostridia(pre-HFD)	1.21501
Unknown(post-HFD)	1.17162
Ruminococcaceae(post-HFD)	1.16346
Lachnospiraceae(pre-HFD)	1.13194
Peptostreptococcaceae(post-HFD)	1.128
Clostridium_XI(post-HFD)	1.128
Unknown(pre-HFD)	1.11541
Unknown(pre-HFD)	1.07802
Unknown(pre-HFD)	1.07802
Unknown(pre-HFD)	1.07802
Proteobacteria(pre-HFD)	1.07705
Deltaproteobacteria(pre-HFD)	1.07673
Oscillibacter(pre-HFD)	1.07512
Unknown(pre-HFD)	1.06629
Anaerotruncus(pre-HFD)	1.04404
Deferribacteres(pre-HFD)	1.03321
Deferribacteres(pre-HFD)	1.03321
Deferribacterales(pre-HFD)	1.03321
Deferribacteraceae(pre-HFD)	1.03321
Mucispirillum(pre-HFD)	1.03321
Clostridium_XlVb(post-HFD)	1.0322
Desulfovibrionaceae(pre-HFD)	1.02333
Epsilonproteobacteria(pre-HFD)	1.023
Campylobacterales(pre-HFD)	1.023
Helicobacteraceae(pre-HFD)	1.023
Helicobacter(pre-HFD)	1.023
Desulfovibrionales(pre-HFD)	1.0096
Anaerotruncus(post-HFD)	1.00422
Unknown(post-HFD)	0.989214
Unknown(post-HFD)	0.989214
Unknown(post-HFD)	0.989214
Unknown(post-HFD)	0.989214
Firmicutes(post-HFD)	0.985585
Odoribacter(pre-HFD)	0.972824
Odoribacter(post-HFD)	0.944868
FIR/BAC(pre-HFD)(pre-HFD)	0.890724
Shannon DI(post-HFD)	0.873102
Bacilli(post-HFD)	0.84914
Lactobacillales(post-HFD)	0.84905
Barnesiella(pre-HFD)	0.845567
Clostridia(post-HFD)	0.837934
Lactobacillaceae(post-HFD)	0.827738
Lactobacillus(post-HFD)	0.827738
Clostridiales(post-HFD)	0.824825
Unknown(post-HFD)	0.823195
Unknown(post-HFD)	0.823195
Unknown(post-HFD)	0.823195
Unknown(post-HFD)	0.823195
Unknown(post-HFD)	0.823195
Clostridiaceae_1(pre-HFD)	0.790943
Clostridium_sensu_stricto(pre-HFD)	0.790943
Parabacteroides(pre-HFD)	0.736318
Lachnospiraceae(post-HFD)	0.712231
Unknown(pre-HFD)	0.711487
Unknown(pre-HFD)	0.711487
Unknown(pre-HFD)	0.711487
Unknown(pre-HFD)	0.711487
Clostridium_IV(pre-HFD)	0.697762
Verrucomicrobia(pre-HFD)	0.697669
Verrucomicrobiae(pre-HFD)	0.697669
Verrucomicrobiales(pre-HFD)	0.697669
Verrucomicrobiaceae(pre-HFD)	0.697669
Akkermansia(pre-HFD)	0.697669
Unknown(pre-HFD)	0.694217
Turicibacter(pre-HFD)	0.676728
Unknown(pre-HFD)	0.670431
Unknown(pre-HFD)	0.670431
Lactococcus(post-HFD)	0.647705
Unknown(post-HFD)	0.642954
Unknown(post-HFD)	0.642954
Unknown(post-HFD)	0.642954
Butyricimonas(post-HFD)	0.610617
Barnesiella(post-HFD)	0.603939
Parabacteroides(post-HFD)	0.592841
Unknown(post-HFD)	0.592547
Allobaculum(pre-HFD)	0.585117
Clostridium_XlVa(post-HFD)	0.575629
Streptococcaceae(post-HFD)	0.570822
Rikenellaceae(post-HFD)	0.544412
Porphyromonadaceae(post-HFD)	0.542008
Candidatus_Saccharibacteria(post-HFD)	0.54014
Unknown(post-HFD)	0.54014
Unknown(post-HFD)	0.54014
Unknown(post-HFD)	0.54014
Unknown(post-HFD)	0.54014
Alistipes(post-HFD)	0.526398
Rikenellaceae(pre-HFD)	0.525151
Deferribacteres(post-HFD)	0.520743
Deferribacteres(post-HFD)	0.520743
Deferribacterales(post-HFD)	0.520743
Deferribacteraceae(post-HFD)	0.520743
Mucispirillum(post-HFD)	0.520743
Bacteroidetes(post-HFD)	0.5207
Ruminococcaceae(pre-HFD)	0.511782
Desulfovibrio(post-HFD)	0.499343
Bacteroidetes(pre-HFD)	0.48602
Alistipes(pre-HFD)	0.472503
Oscillibacter(post-HFD)	0.455869
Butyricimonas(pre-HFD)	0.4536
Desulfovibrionaceae(post-HFD)	0.436488
Unknown(post-HFD)	0.422852
Desulfovibrionales(post-HFD)	0.408044
Deltaproteobacteria(post-HFD)	0.401167
Unknown(pre-HFD)	0.398345
Unknown(pre-HFD)	0.398345
Unknown(pre-HFD)	0.398345
Unknown(pre-HFD)	0.398345
Unknown(pre-HFD)	0.398345
Shannon DI(pre-HFD)(pre-HFD)	0.391263
Unknown(pre-HFD)	0.387042
Bacilli(pre-HFD)	0.383462
Lactobacillales(pre-HFD)	0.382512
Bacteroidia(post-HFD)	0.364669
Bacteroidales(post-HFD)	0.364669
Lactobacillaceae(pre-HFD)	0.351584
Lactobacillus(pre-HFD)	0.351584
Clostridium_XVIII(pre-HFD)	0.335143
Bacteroidaceae(pre-HFD)	0.332591
Bacteroides(pre-HFD)	0.332591
Erysipelotrichia(pre-HFD)	0.30402
Erysipelotrichales(pre-HFD)	0.30402
Erysipelotrichaceae(pre-HFD)	0.30402
Flavonifractor(pre-HFD)	0.299387
Epsilonproteobacteria(post-HFD)	0.2642
Campylobacterales(post-HFD)	0.2642
Helicobacteraceae(post-HFD)	0.2642
Helicobacter(post-HFD)	0.2642
Peptococcaceae_1(pre-HFD)	0.263823
Peptococcus(pre-HFD)	0.263823
Clostridium_IV(post-HFD)	0.26299
Bacteroidia(pre-HFD)	0.253742
Bacteroidales(pre-HFD)	0.253742
Alphaproteobacteria(pre-HFD)	0.237416
Unknown(pre-HFD)	0.237416
Unknown(pre-HFD)	0.237416
Unknown(pre-HFD)	0.237416
Unknown(post-HFD)	0.228615
Unknown(post-HFD)	0.228615
Unknown(post-HFD)	0.228615
FIR/BAC(post-HFD)	0.192104
Peptococcaceae_1(post-HFD)	0.115167
Peptococcus(post-HFD)	0.115167
Unknown(post-HFD)	0.103223
Unknown(post-HFD)	0.103223
Bacteroidaceae(post-HFD)	0.0869967
Bacteroides(post-HFD)	0.0869967
Porphyromonadaceae(pre-HFD)	0.0700378
Unknown(pre-HFD)	0.0675193
Proteobacteria(post-HFD)	0.0616583

## Sheet: M7
Variable	VIP
Unknown(post-HFD)	1.9634
Unknown(post-HFD)	1.9634
Unknown(post-HFD)	1.9634
Unknown(post-HFD)	1.9634
Anaerotruncus(pre-HFD)	1.82532
Unknown(pre-HFD)	1.76558
Unknown(pre-HFD)	1.76558
Unknown(pre-HFD)	1.76558
Unknown(pre-HFD)	1.76558
Erysipelotrichia(post-HFD)	1.71795
Erysipelotrichales(post-HFD)	1.71795
Erysipelotrichaceae(post-HFD)	1.71795
Bacteroidetes(post-HFD)	1.68158
Offspring tissue n-6/n-3(pre-HFD)	1.62704
Unknown(pre-HFD)	1.59937
Unknown(pre-HFD)	1.59937
Unknown(pre-HFD)	1.59937
Unknown(post-HFD)	1.59137
Unknown(post-HFD)	1.59137
Unknown(post-HFD)	1.59137
Unknown(post-HFD)	1.59137
Desulfovibrionaceae(post-HFD)	1.46687
Clostridium_XVIII(post-HFD)	1.46471
Unknown(post-HFD)	1.45852
Desulfovibrionales(post-HFD)	1.44275
Deltaproteobacteria(post-HFD)	1.43281
Odoribacter(post-HFD)	1.42429
Peptostreptococcaceae(pre-HFD)	1.37755
Clostridium_XI(pre-HFD)	1.37755
Butyricimonas(post-HFD)	1.37594
Barnesiella(pre-HFD)	1.33708
Shannon DI(pre-HFD)(pre-HFD)	1.3187
Proteobacteria(post-HFD)	1.31716
Peptostreptococcaceae(post-HFD)	1.30689
Clostridium_XI(post-HFD)	1.30689
Clostridium_XlVb(pre-HFD)	1.28576
Unknown(pre-HFD)	1.27236
Unknown(pre-HFD)	1.27236
Unknown(pre-HFD)	1.27236
Lactobacillales(post-HFD)	1.26725
Bacilli(post-HFD)	1.2672
Lactobacillaceae(post-HFD)	1.26201
Lactobacillus(post-HFD)	1.26201
Parabacteroides(post-HFD)	1.22712
Eubacteriaceae(pre-HFD)	1.21048
Eubacterium(pre-HFD)	1.21048
Parabacteroides(pre-HFD)	1.20945
Butyricimonas(pre-HFD)	1.19073
Unknown(post-HFD)	1.14523
Rikenellaceae(post-HFD)	1.13336
Clostridium_XlVa(pre-HFD)	1.12997
Alistipes(post-HFD)	1.11704
Unknown(post-HFD)	1.08925
Streptococcaceae(pre-HFD)	1.0714
Unknown(post-HFD)	1.06939
Bacteroidetes(pre-HFD)	1.05222
Clostridiales(pre-HFD)	1.03531
Deferribacteres(pre-HFD)	1.02718
Deferribacteres(pre-HFD)	1.02718
Deferribacterales(pre-HFD)	1.02718
Deferribacteraceae(pre-HFD)	1.02718
Mucispirillum(pre-HFD)	1.02718
Rikenella(pre-HFD)	1.01317
Clostridia(pre-HFD)	1.01313
Unknown(pre-HFD)	1.0051
Unknown(pre-HFD)	1.0051
Unknown(pre-HFD)	1.0051
Unknown(pre-HFD)	1.0051
Deltaproteobacteria(pre-HFD)	0.994571
Unknown(pre-HFD)	0.988048
Unknown(post-HFD)	0.97747
Unknown(post-HFD)	0.97747
Oscillibacter(pre-HFD)	0.975265
Unknown(pre-HFD)	0.947565
Epsilonproteobacteria(post-HFD)	0.942367
Campylobacterales(post-HFD)	0.942367
Helicobacteraceae(post-HFD)	0.942367
Helicobacter(post-HFD)	0.942367
Firmicutes(pre-HFD)	0.933224
Lachnospiraceae(pre-HFD)	0.918914
Unknown(pre-HFD)	0.917526
Proteobacteria(pre-HFD)	0.915891
Candidatus_Saccharibacteria(post-HFD)	0.909022
Unknown(post-HFD)	0.909022
Unknown(post-HFD)	0.909022
Unknown(post-HFD)	0.909022
Unknown(post-HFD)	0.909022
Desulfovibrionaceae(pre-HFD)	0.906295
Clostridium_IV(pre-HFD)	0.903557
Desulfovibrionales(pre-HFD)	0.902912
Ruminococcaceae(post-HFD)	0.900609
Epsilonproteobacteria(pre-HFD)	0.860808
Campylobacterales(pre-HFD)	0.860808
Helicobacteraceae(pre-HFD)	0.860808
Helicobacter(pre-HFD)	0.860808
Deferribacteres(post-HFD)	0.858544
Deferribacteres(post-HFD)	0.858544
Deferribacterales(post-HFD)	0.858544
Deferribacteraceae(post-HFD)	0.858544
Mucispirillum(post-HFD)	0.858544
FIR/BAC(pre-HFD)(pre-HFD)	0.851101
Clostridium_XlVa(post-HFD)	0.845407
Rikenellaceae(pre-HFD)	0.827671
Lactococcus(pre-HFD)	0.824234
Verrucomicrobia(post-HFD)	0.823259
Verrucomicrobiae(post-HFD)	0.823259
Verrucomicrobiales(post-HFD)	0.823259
Verrucomicrobiaceae(post-HFD)	0.823259
Akkermansia(post-HFD)	0.823259
Bacteroidia(post-HFD)	0.822841
Bacteroidales(post-HFD)	0.822841
Alistipes(pre-HFD)	0.808513
Firmicutes(post-HFD)	0.803617
Odoribacter(pre-HFD)	0.800462
Desulfovibrio(post-HFD)	0.73441
Lactobacillaceae(pre-HFD)	0.724332
Lactobacillus(pre-HFD)	0.724332
Bacteroidia(pre-HFD)	0.7167
Bacteroidales(pre-HFD)	0.7167
Lactobacillales(pre-HFD)	0.692784
Bacilli(pre-HFD)	0.692087
Anaerotruncus(post-HFD)	0.691844
Ruminococcaceae(pre-HFD)	0.64657
FIR/BAC(post-HFD)	0.636973
Lactococcus(post-HFD)	0.612616
Unknown(pre-HFD)	0.602258
Unknown(pre-HFD)	0.591863
Peptococcaceae_1(post-HFD)	0.577967
Peptococcus(post-HFD)	0.577967
Clostridiaceae_1(pre-HFD)	0.576177
Clostridium_sensu_stricto(pre-HFD)	0.576177
Unknown(post-HFD)	0.56534
Unknown(post-HFD)	0.56534
Unknown(post-HFD)	0.56534
Unknown(post-HFD)	0.56534
Unknown(post-HFD)	0.56534
Bacteroidaceae(pre-HFD)	0.540714
Bacteroides(pre-HFD)	0.540714
Clostridiales(post-HFD)	0.540601
Clostridia(post-HFD)	0.532244
Barnesiella(post-HFD)	0.525479
Streptococcaceae(post-HFD)	0.519677
Peptococcaceae_1(pre-HFD)	0.514416
Peptococcus(pre-HFD)	0.514416
Unknown(post-HFD)	0.498786
Unknown(post-HFD)	0.498786
Verrucomicrobia(pre-HFD)	0.496114
Verrucomicrobiae(pre-HFD)	0.496114
Verrucomicrobiales(pre-HFD)	0.496114
Verrucomicrobiaceae(pre-HFD)	0.496114
Akkermansia(pre-HFD)	0.496114
Clostridium_XVIII(pre-HFD)	0.469213
Porphyromonadaceae(pre-HFD)	0.464209
Unknown(pre-HFD)	0.451425
Unknown(pre-HFD)	0.451425
Unknown(pre-HFD)	0.451425
Unknown(pre-HFD)	0.451425
Unknown(pre-HFD)	0.451425
Unknown(post-HFD)	0.436162
Unknown(post-HFD)	0.384692
Unknown(post-HFD)	0.384692
Unknown(post-HFD)	0.384692
Alphaproteobacteria(pre-HFD)	0.349836
Unknown(pre-HFD)	0.349836
Unknown(pre-HFD)	0.349836
Unknown(pre-HFD)	0.349836
Porphyromonadaceae(post-HFD)	0.326355
Flavonifractor(pre-HFD)	0.322076
Bacteroidaceae(post-HFD)	0.2975
Bacteroides(post-HFD)	0.2975
Lachnospiraceae(post-HFD)	0.275039
Turicibacter(pre-HFD)	0.196377
Allobaculum(pre-HFD)	0.186789
Erysipelotrichia(pre-HFD)	0.151823
Erysipelotrichales(pre-HFD)	0.151823
Erysipelotrichaceae(pre-HFD)	0.151823
Oscillibacter(post-HFD)	0.118801
Shannon DI(post-HFD)	0.108801
Clostridium_XlVb(post-HFD)	0.102531
Unknown(pre-HFD)	0.0943747
Unknown(pre-HFD)	0.0943747
Unknown(post-HFD)	0.0779366
Unknown(post-HFD)	0.0779366
Unknown(post-HFD)	0.0779366
Clostridium_IV(post-HFD)	0.0278988

## Sheet: M8
Variable	VIP		Variables	R² (coefficient of determination)
Rikenellaceae	1.64751		Bacteroidetes	0.424287
Alistipes	1.64539		Deltaproteobacteria	0.375124
Odoribacter	1.59648		Proteobacteria	0.317448
Barnesiella	1.58168		Ruminococcaceae	0.324178
Bacteroidetes	1.47057		Shannon ADI	0.325667
Parabacteroides	1.44475		Firmicutes	0.279265
Bacteroidales	1.38827		Clostridia	0.277194
Bacteroidia	1.38827		Helicobacter	0.259878
Deltaproteobacteria	1.38275		Epsilonproteobacteria	0.259878
Clostridium_IV	1.32487		FIR/BAC ratio	0.255534
Desulfovibrionales	1.32299		Verrucomicrobia	0.182061
Desulfovibrionaceae	1.3194		Porphyromonadaceae	0.194845
Ruminococcaceae	1.28543		Bacteroides	0.169842
Streptococcaceae	1.26552		Akkermansia	0.182061
Clostridium_XlVa	1.24335		Lachinospiraceae	0.0672511
Lactococcus	1.21066
Clostridia	1.18864
Campylobacterales	1.15091
Epsilonproteobacteria	1.15091
Helicobacter	1.15091
Helicobacteraceae	1.15091
FIR/BAC(pre-HFD)	1.14125
Butyricimonas	1.13068
Oscillibacter	1.12785
Allobaculum	1.07449
Flavonifractor	1.04732
Turicibacter	1.04016
Deferribacteraceae	1.03124
Deferribacterales	1.03124
Deferribacteres	1.03124
Mucispirillum	1.03124
Porphyromonadaceae	1
Clostridiaceae_1	1
Clostridium_sensu_stricto	1
Akkermansia	1
Verrucomicrobia	1
Verrucomicrobiaceae	1
Verrucomicrobiae	1
Verrucomicrobiales	1
Bacteroidaceae	1
Bacteroides	1
Rikenella	1
Erysipelotrichaceae	0.767957
Erysipelotrichales	0.767957
Erysipelotrichia	0.767957
Clostridium_XI	0.651845
Peptostreptococcaceae	0.651845
Lachnospiraceae	0.585473
Clostridium_XVIII	0.487158
Lactobacillaceae	0.33638

## Sheet: M3
Variable	VIP
Verrucomicrobia(post-HFD)	2.40875
Verrucomicrobiae(post-HFD)	2.40875
Verrucomicrobiales(post-HFD)	2.40875
Verrucomicrobiaceae(post-HFD)	2.40875
Akkermansia(post-HFD)	2.40875
Peptostreptococcaceae(pre-HFD)	2.25971
Clostridium_XI(pre-HFD)	2.25971
Maternal tissue n-6/n-3(post-HFD)	2.0557
Unknown(post-HFD)	2.00576
Unknown(post-HFD)	2.00576
Unknown(post-HFD)	2.00576
Unknown(post-HFD)	2.00576
Rikenella(pre-HFD)	1.88643
Unknown(pre-HFD)	1.78889
Unknown(pre-HFD)	1.78889
Unknown(pre-HFD)	1.78889
Erysipelotrichia(post-HFD)	1.71751
Erysipelotrichales(post-HFD)	1.71751
Erysipelotrichaceae(post-HFD)	1.71751
Clostridium_XVIII(post-HFD)	1.56157
Clostridium_XlVa(pre-HFD)	1.54148
Eubacteriaceae(pre-HFD)	1.45661
Eubacterium(pre-HFD)	1.45661
Streptococcaceae(pre-HFD)	1.44502
Unknown(post-HFD)	1.37764
Unknown(pre-HFD)	1.35692
Unknown(pre-HFD)	1.35692
Unknown(pre-HFD)	1.35692
Unknown(pre-HFD)	1.35692
Clostridium_XlVb(pre-HFD)	1.31478
Firmicutes(pre-HFD)	1.29662
Unknown(post-HFD)	1.29042
Unknown(post-HFD)	1.29042
Lactococcus(pre-HFD)	1.28497
Unknown(post-HFD)	1.26887
Clostridiales(pre-HFD)	1.2364
Clostridia(pre-HFD)	1.21161
Unknown(post-HFD)	1.16834
Ruminococcaceae(post-HFD)	1.16021
Lachnospiraceae(pre-HFD)	1.12877
Peptostreptococcaceae(post-HFD)	1.12484
Clostridium_XI(post-HFD)	1.12484
Unknown(pre-HFD)	1.11228
Unknown(pre-HFD)	1.07501
Unknown(pre-HFD)	1.07501
Unknown(pre-HFD)	1.07501
Proteobacteria(pre-HFD)	1.07404
Deltaproteobacteria(pre-HFD)	1.07372
Oscillibacter(pre-HFD)	1.07211
Unknown(pre-HFD)	1.06331
Anaerotruncus(pre-HFD)	1.04112
Deferribacteres(pre-HFD)	1.03032
Deferribacteres(pre-HFD)	1.03032
Deferribacterales(pre-HFD)	1.03032
Deferribacteraceae(pre-HFD)	1.03032
Mucispirillum(pre-HFD)	1.03032
Clostridium_XlVb(post-HFD)	1.02931
Desulfovibrionaceae(pre-HFD)	1.02047
Epsilonproteobacteria(pre-HFD)	1.02014
Campylobacterales(pre-HFD)	1.02014
Helicobacteraceae(pre-HFD)	1.02014
Helicobacter(pre-HFD)	1.02014
Desulfovibrionales(pre-HFD)	1.00677
Anaerotruncus(post-HFD)	1.00141
Unknown(post-HFD)	0.986445
Unknown(post-HFD)	0.986445
Unknown(post-HFD)	0.986445
Unknown(post-HFD)	0.986445
Firmicutes(post-HFD)	0.982826
Odoribacter(pre-HFD)	0.970101
Odoribacter(post-HFD)	0.942223
FIR/BAC(pre-HFD)(pre-HFD)	0.888231
Shannon DI(post-HFD)	0.870658
Bacilli(post-HFD)	0.846763
Lactobacillales(post-HFD)	0.846674
Barnesiella(pre-HFD)	0.8432
Clostridia(post-HFD)	0.835588
Lactobacillaceae(post-HFD)	0.825421
Lactobacillus(post-HFD)	0.825421
Clostridiales(post-HFD)	0.822516
Unknown(post-HFD)	0.820891
Unknown(post-HFD)	0.820891
Unknown(post-HFD)	0.820891
Unknown(post-HFD)	0.820891
Unknown(post-HFD)	0.820891
Clostridiaceae_1(pre-HFD)	0.788728
Clostridium_sensu_stricto(pre-HFD)	0.788728
Parabacteroides(pre-HFD)	0.734257
Lachnospiraceae(post-HFD)	0.710237
Unknown(pre-HFD)	0.709495
Unknown(pre-HFD)	0.709495
Unknown(pre-HFD)	0.709495
Unknown(pre-HFD)	0.709495
Clostridium_IV(pre-HFD)	0.695809
Verrucomicrobia(pre-HFD)	0.695716
Verrucomicrobiae(pre-HFD)	0.695716
Verrucomicrobiales(pre-HFD)	0.695716
Verrucomicrobiaceae(pre-HFD)	0.695716
Akkermansia(pre-HFD)	0.695716
Unknown(pre-HFD)	0.692274
Turicibacter(pre-HFD)	0.674834
Unknown(pre-HFD)	0.668555
Unknown(pre-HFD)	0.668555
Lactococcus(post-HFD)	0.645892
Unknown(post-HFD)	0.641155
Unknown(post-HFD)	0.641155
Unknown(post-HFD)	0.641155
Butyricimonas(post-HFD)	0.608908
Barnesiella(post-HFD)	0.602248
Parabacteroides(post-HFD)	0.591181
Unknown(post-HFD)	0.590889
Allobaculum(pre-HFD)	0.58348
Clostridium_XlVa(post-HFD)	0.574018
Streptococcaceae(post-HFD)	0.569224
Rikenellaceae(post-HFD)	0.542888
Porphyromonadaceae(post-HFD)	0.540491
Candidatus_Saccharibacteria(post-HFD)	0.538628
Unknown(post-HFD)	0.538628
Unknown(post-HFD)	0.538628
Unknown(post-HFD)	0.538628
Unknown(post-HFD)	0.538628
Alistipes(post-HFD)	0.524924
Rikenellaceae(pre-HFD)	0.523681
Deferribacteres(post-HFD)	0.519285
Deferribacteres(post-HFD)	0.519285
Deferribacterales(post-HFD)	0.519285
Deferribacteraceae(post-HFD)	0.519285
Mucispirillum(post-HFD)	0.519285
Bacteroidetes(post-HFD)	0.519243
Ruminococcaceae(pre-HFD)	0.510349
Desulfovibrio(post-HFD)	0.497945
Bacteroidetes(pre-HFD)	0.484659
Alistipes(pre-HFD)	0.47118
Oscillibacter(post-HFD)	0.454593
Butyricimonas(pre-HFD)	0.45233
Desulfovibrionaceae(post-HFD)	0.435267
Unknown(post-HFD)	0.421668
Desulfovibrionales(post-HFD)	0.406902
Deltaproteobacteria(post-HFD)	0.400044
Unknown(pre-HFD)	0.39723
Unknown(pre-HFD)	0.39723
Unknown(pre-HFD)	0.39723
Unknown(pre-HFD)	0.39723
Unknown(pre-HFD)	0.39723
Shannon DI(pre-HFD)(pre-HFD)	0.390168
Unknown(pre-HFD)	0.385958
Bacilli(pre-HFD)	0.382389
Lactobacillales(pre-HFD)	0.381442
Bacteroidia(post-HFD)	0.363648
Bacteroidales(post-HFD)	0.363648
Lactobacillaceae(pre-HFD)	0.3506
Lactobacillus(pre-HFD)	0.3506
Clostridium_XVIII(pre-HFD)	0.334205
Bacteroidaceae(pre-HFD)	0.33166
Bacteroides(pre-HFD)	0.33166
Erysipelotrichia(pre-HFD)	0.303169
Erysipelotrichales(pre-HFD)	0.303169
Erysipelotrichaceae(pre-HFD)	0.303169
Flavonifractor(pre-HFD)	0.298548
Epsilonproteobacteria(post-HFD)	0.26346
Campylobacterales(post-HFD)	0.26346
Helicobacteraceae(post-HFD)	0.26346
Helicobacter(post-HFD)	0.26346
Peptococcaceae_1(pre-HFD)	0.263085
Peptococcus(pre-HFD)	0.263085
Clostridium_IV(post-HFD)	0.262253
Bacteroidia(pre-HFD)	0.253032
Bacteroidales(pre-HFD)	0.253032
Alphaproteobacteria(pre-HFD)	0.236751
Unknown(pre-HFD)	0.236751
Unknown(pre-HFD)	0.236751
Unknown(pre-HFD)	0.236751
Unknown(post-HFD)	0.227975
Unknown(post-HFD)	0.227975
Unknown(post-HFD)	0.227975
FIR/BAC(post-HFD)	0.191566
Peptococcaceae_1(post-HFD)	0.114844
Peptococcus(post-HFD)	0.114844
Unknown(post-HFD)	0.102934
Unknown(post-HFD)	0.102934
Bacteroidaceae(post-HFD)	0.0867532
Bacteroides(post-HFD)	0.0867532
Porphyromonadaceae(pre-HFD)	0.0698417
Unknown(pre-HFD)	0.0673303
Proteobacteria(post-HFD)	0.0614857

## Sheet: M9
Variable	VIP
Anaerotruncus(pre-HFD)	2.04941
Bacteroidetes(post-HFD)	1.99593
Desulfovibrionaceae(post-HFD)	1.85295
Unknown(post-HFD)	1.84796
Desulfovibrionales(post-HFD)	1.83621
Deltaproteobacteria(post-HFD)	1.82509
Proteobacteria(post-HFD)	1.79924
Unknown(pre-HFD)	1.67505
Unknown(pre-HFD)	1.67505
Unknown(pre-HFD)	1.67505
Unknown(pre-HFD)	1.67505
Unknown(post-HFD)	1.6279
Unknown(post-HFD)	1.6279
Unknown(post-HFD)	1.6279
Unknown(post-HFD)	1.6279
Unknown(post-HFD)	1.62407
Unknown(post-HFD)	1.62407
Unknown(post-HFD)	1.62407
Unknown(post-HFD)	1.62407
Shannon DI(pre-HFD)(pre-HFD)	1.5725
Butyricimonas(post-HFD)	1.55263
Deferribacteres(post-HFD)	1.513
Deferribacteres(post-HFD)	1.513
Deferribacterales(post-HFD)	1.513
Deferribacteraceae(post-HFD)	1.513
Mucispirillum(post-HFD)	1.513
Odoribacter(post-HFD)	1.46181
Erysipelotrichia(post-HFD)	1.42884
Erysipelotrichales(post-HFD)	1.42884
Erysipelotrichaceae(post-HFD)	1.42884
Epsilonproteobacteria(post-HFD)	1.40756
Campylobacterales(post-HFD)	1.40756
Helicobacteraceae(post-HFD)	1.40756
Helicobacter(post-HFD)	1.40756
Parabacteroides(post-HFD)	1.38582
Butyricimonas(pre-HFD)	1.36685
Unknown(pre-HFD)	1.32461
Rikenellaceae(post-HFD)	1.2871
Bacteroidia(post-HFD)	1.28676
Bacteroidales(post-HFD)	1.28676
Barnesiella(pre-HFD)	1.27973
Alistipes(post-HFD)	1.27277
Parabacteroides(pre-HFD)	1.25158
Unknown(pre-HFD)	1.23822
Unknown(pre-HFD)	1.23822
Unknown(pre-HFD)	1.23822
Offspring tissue n-6/n-3(pre-HFD)	1.22859
Clostridium_XVIII(post-HFD)	1.20126
Lactobacillaceae(pre-HFD)	1.18908
Lactobacillus(pre-HFD)	1.18908
Lactobacillales(post-HFD)	1.18394
Bacilli(post-HFD)	1.18382
Lactobacillaceae(post-HFD)	1.18171
Lactobacillus(post-HFD)	1.18171
Peptostreptococcaceae(post-HFD)	1.17628
Clostridium_XI(post-HFD)	1.17628
Lactobacillales(pre-HFD)	1.16187
Bacilli(pre-HFD)	1.16145
Bacteroidetes(pre-HFD)	1.11626
Unknown(pre-HFD)	1.11535
Unknown(pre-HFD)	1.11535
Unknown(pre-HFD)	1.11535
Verrucomicrobia(pre-HFD)	1.06246
Verrucomicrobiae(pre-HFD)	1.06246
Verrucomicrobiales(pre-HFD)	1.06246
Verrucomicrobiaceae(pre-HFD)	1.06246
Akkermansia(pre-HFD)	1.06246
Unknown(pre-HFD)	1.02169
Unknown(pre-HFD)	1.02169
Unknown(pre-HFD)	1.02169
Unknown(pre-HFD)	1.02169
Unknown(post-HFD)	1.00841
FIR/BAC(post-HFD)	0.997686
Clostridium_XlVb(pre-HFD)	0.942774
Eubacteriaceae(pre-HFD)	0.898934
Eubacterium(pre-HFD)	0.898934
Candidatus_Saccharibacteria(post-HFD)	0.882515
Unknown(post-HFD)	0.882515
Unknown(post-HFD)	0.882515
Unknown(post-HFD)	0.882515
Unknown(post-HFD)	0.882515
Unknown(post-HFD)	0.869182
Unknown(post-HFD)	0.864645
Unknown(post-HFD)	0.864645
Lachnospiraceae(post-HFD)	0.852816
Deferribacteres(pre-HFD)	0.848466
Deferribacteres(pre-HFD)	0.848466
Deferribacterales(pre-HFD)	0.848466
Deferribacteraceae(pre-HFD)	0.848466
Mucispirillum(pre-HFD)	0.848466
Clostridium_IV(pre-HFD)	0.809247
Clostridium_XlVa(post-HFD)	0.807708
Maternal tissue n-6/n-3(post-HFD)	0.800479
Unknown(post-HFD)	0.799906
Unknown(post-HFD)	0.799906
Unknown(post-HFD)	0.799906
Desulfovibrio(post-HFD)	0.786989
Unknown(post-HFD)	0.786538
Alistipes(pre-HFD)	0.786257
Deltaproteobacteria(pre-HFD)	0.783635
Rikenellaceae(pre-HFD)	0.780852
Bacteroidia(pre-HFD)	0.774259
Bacteroidales(pre-HFD)	0.774259
Unknown(post-HFD)	0.761372
Peptococcaceae_1(post-HFD)	0.761095
Peptococcus(post-HFD)	0.761095
Clostridium_XlVb(post-HFD)	0.75445
Unknown(pre-HFD)	0.720225
Streptococcaceae(pre-HFD)	0.714665
Oscillibacter(pre-HFD)	0.706573
Desulfovibrionales(pre-HFD)	0.699321
Desulfovibrionaceae(pre-HFD)	0.695241
Clostridiales(pre-HFD)	0.673721
Proteobacteria(pre-HFD)	0.668391
Clostridium_XlVa(pre-HFD)	0.663428
Alphaproteobacteria(pre-HFD)	0.660787
Unknown(pre-HFD)	0.660787
Unknown(pre-HFD)	0.660787
Unknown(pre-HFD)	0.660787
Clostridia(pre-HFD)	0.656517
Porphyromonadaceae(post-HFD)	0.654466
Porphyromonadaceae(pre-HFD)	0.633915
FIR/BAC(pre-HFD)(pre-HFD)	0.631565
Epsilonproteobacteria(pre-HFD)	0.621639
Campylobacterales(pre-HFD)	0.621639
Helicobacteraceae(pre-HFD)	0.621639
Helicobacter(pre-HFD)	0.621639
Peptostreptococcaceae(pre-HFD)	0.603195
Clostridium_XI(pre-HFD)	0.603195
Unknown(post-HFD)	0.587097
Unknown(post-HFD)	0.587097
Unknown(pre-HFD)	0.573818
Unknown(pre-HFD)	0.571105
Lachnospiraceae(pre-HFD)	0.566716
Ruminococcaceae(pre-HFD)	0.554298
Lactococcus(post-HFD)	0.547272
Ruminococcaceae(post-HFD)	0.544736
Peptococcaceae_1(pre-HFD)	0.542334
Peptococcus(pre-HFD)	0.542334
Firmicutes(post-HFD)	0.539188
Allobaculum(pre-HFD)	0.516257
Odoribacter(pre-HFD)	0.508749
Firmicutes(pre-HFD)	0.500922
Bacteroidaceae(pre-HFD)	0.496988
Bacteroides(pre-HFD)	0.496988
Clostridium_XVIII(pre-HFD)	0.493574
Bacteroidaceae(post-HFD)	0.489273
Bacteroides(post-HFD)	0.489273
Barnesiella(post-HFD)	0.473723
Streptococcaceae(post-HFD)	0.462973
Lactococcus(pre-HFD)	0.461886
Unknown(pre-HFD)	0.454192
Anaerotruncus(post-HFD)	0.449983
Unknown(pre-HFD)	0.424379
Unknown(pre-HFD)	0.424379
Unknown(pre-HFD)	0.424379
Unknown(pre-HFD)	0.424379
Unknown(pre-HFD)	0.424379
Shannon DI(post-HFD)	0.416287
Erysipelotrichia(pre-HFD)	0.411321
Erysipelotrichales(pre-HFD)	0.411321
Erysipelotrichaceae(pre-HFD)	0.411321
Clostridiaceae_1(pre-HFD)	0.335886
Clostridium_sensu_stricto(pre-HFD)	0.335886
Verrucomicrobia(post-HFD)	0.331885
Verrucomicrobiae(post-HFD)	0.331885
Verrucomicrobiales(post-HFD)	0.331885
Verrucomicrobiaceae(post-HFD)	0.331885
Akkermansia(post-HFD)	0.331885
Clostridiales(post-HFD)	0.280527
Clostridia(post-HFD)	0.26357
Unknown(post-HFD)	0.246455
Unknown(post-HFD)	0.246455
Unknown(post-HFD)	0.246455
Unknown(post-HFD)	0.246455
Unknown(post-HFD)	0.246455
Flavonifractor(pre-HFD)	0.24156
Rikenella(pre-HFD)	0.23169
Unknown(pre-HFD)	0.198853
Unknown(pre-HFD)	0.198853
Clostridium_IV(post-HFD)	0.189759
Oscillibacter(post-HFD)	0.189523
Turicibacter(pre-HFD)	0.149817
Unknown(post-HFD)	0.0216065
Unknown(post-HFD)	0.0216065
Unknown(post-HFD)	0.0216065

[truncated: 5 more sheets: M10, M11, M12, M13, M14]
